# Supplementary material for: Mussel-Inspired Calcium Alginate/Polyacrylamide Dual Network Hydrogel: A Physical Barrier to Prevent Postoperative Intrauterine Re-adhesion
Source: Preprints.org preprint supplement (doi:10.20944/preprints202311.0300.v1), 2023-11-06
Supplement: Supplementary file 1 [file Supporting.docx]

### Mussel-inspired calcium alginate/polyacrylamide dual network hydrogel: a physical barrier to prevent postoperative re-adhesion

Zekun Su1, Beibei Xue1, Chang Xu2, Yue Kang3, Xufeng Dong1*

1 School of Materials Science and Engineering, Dalian University of Technology, Dalian, 116024, China.

2 Institute of Cardio-Cerebrovascular Medicine, Central Hospital of Dalian University of Technology, Dalian, 116089, P. R. China.

3 Department of Breast Surgery, Liaoning Cancer Hospital & Institute, Shenyang, 110042, China.

* Corresponding author.

E-mail addresses: dongxf@dlut.edu.cn (X. Dong)


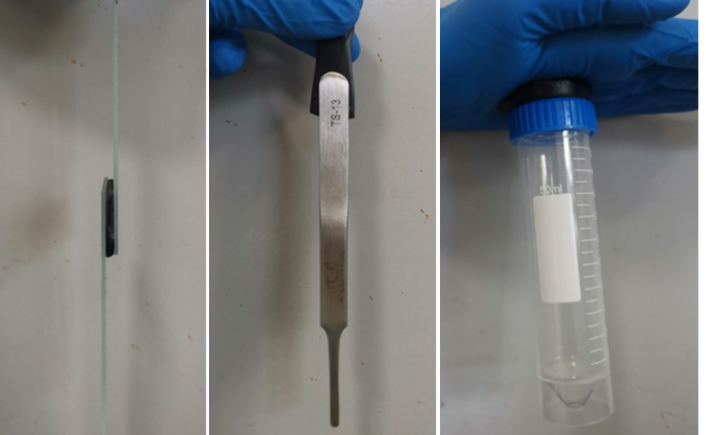


Figure S1. Adhesion of 10 PDA-CA-PAM hydrogel to other materials.


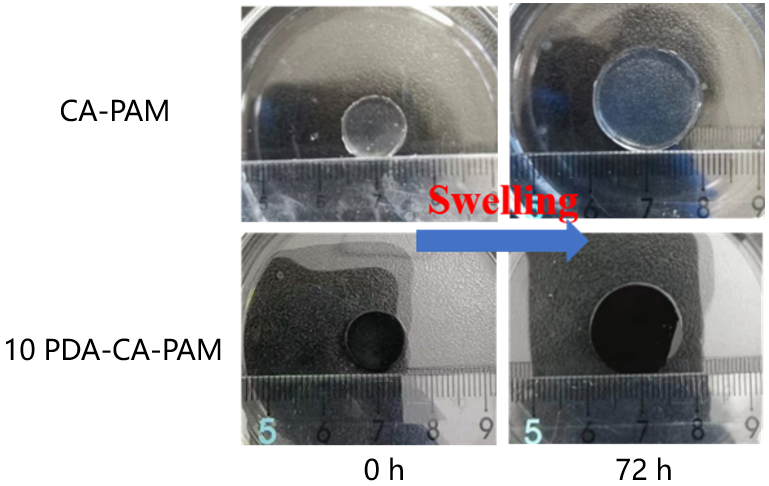


Figure S2. Comparison between CA-PAM and PDA-CA-PAM hydrogel before and after swelling.
